# Supplementary material
Source: HighWire-hosted journal article supplement (http://www.qdcxjkg.com/highwire/filestream/113790/field_highwire_adjunct_files/0/supplementary_material_xpert.pdf)
Supplement: supplementary_material_xpert.pdf [file supplementary_material_xpert.pdf]

## SUPPLEMENTARY MATERIAL

**Table S1. Best estimate of number of Xpert tests by population group for each of the 36 countries and for the World**

|                                  | TB-SS             | TB-SS, HIV+      | MDR-TB, high-risk |
|----------------------------------|-------------------|------------------|-------------------|
| Afghanistan                      | 129,470           | 4,402            | 6,708             |
| Armenia                          | 3,390             | 46               | 717               |
| Azerbaijan                       | 19,970            | 1,198            | 4,204             |
| Bangladesh                       | 1,057,720         | 2,380            | 37,976            |
| Bulgaria                         | 8,060             | 9                | 808               |
| Brazil                           | 379,320           | 87,241           | 25,148            |
| Belarus                          | 12,690            | 461              | 2,078             |
| Democratic Republic of the Congo | 736,530           | 133,935          | 30,610            |
| China                            | 4,298,990         | 133,814          | 228,034           |
| Estonia                          | 990               | 114              | 129               |
| Ethiopia                         | 466,340           | 68,319           | 35,304            |
| Georgia                          | 21,400            | 373              | 2,290             |
| Indonesia                        | 1,833,660         | 311,722          | 65,843            |
| India                            | 6,301,650         | 543,663          | 538,807           |
| Kenya                            | 362,600           | 149,892          | 29,600            |
| Kyrgyzstan                       | 16,450            | 458              | 2,049             |
| Cambodia                         | 174,540           | 11,435           | 9,633             |
| Kazakhstan                       | 47,690            | 666              | 16,037            |
| Lithuania                        | 7,190             | 431              | 680               |
| Latvia                           | 3,390             | 322              | 274               |
| Republic of Moldova              | 12,670            | 750              | 2,451             |
| Myanmar                          | 423,180           | 93,232           | 35,696            |
| Mozambique                       | 200,970           | 121,779          | 12,473            |
| Nigeria                          | 454,160           | 112,118          | 25,284            |
| Philippines                      | 891,980           | 42,815           | 43,791            |
| Pakistan                         | 1,042,630         | 3,647            | 65,027            |
| Russian Federation               | 314,160           | 16,724           | 74,630            |
| Thailand                         | 334,500           | 54,176           | 16,629            |
| Tajikistan                       | 22,900            | 566              | 2,874             |
| United Republic of Tanzania      | 247,690           | 94,381           | 15,719            |
| Ukraine                          | 99,760            | 12,970           | 11,373            |
| Uganda                           | 234,560           | 126,695          | 12,271            |
| Uzbekistan                       | 47,110            | 989              | 7,743             |
| Viet Nam                         | 521,450           | 43,274           | 28,596            |
| South Africa                     | 1,321,070         | 796,694          | 127,775           |
| Zimbabwe                         | 116,540           | 87,874           | 13,259            |
| <b>World</b>                     | <b>26,600,000</b> | <b>3,897,376</b> | <b>1,828,259</b>  |
